# Supplementary material for: Intestinal inflammation increases convulsant activity and reduces antiepileptic drug efficacy in a mouse model of epilepsy
Source: PubMed Central journal article supplement (PMC6764994; doi:10.1038/s41598-019-50542-0), 2019-09-27

# **Intestinal inflammation increases convulsant activity and reduces antiepileptic drug efficacy in a mouse model of epilepsy**

Carmen De Caro, Ph.D.<sup>1</sup>, Antonio Leo, Ph.D.<sup>1</sup>, Valentina Nesci, Ph.D.<sup>1</sup>, Carla Ghelardini, Ph.D.<sup>2</sup>, Lorenzo di Cesare Mannelli, Ph.D.<sup>2</sup>, Pasquale Striano, MD<sup>3</sup>, Carmen Avagliano, Ph.D.<sup>4</sup>, Antonio Calignano, Ph.D.<sup>4</sup>, Paolo Mainardi<sup>5</sup>, Andrew Constanti, Ph.D.<sup>6</sup>, Rita Citraro, Ph.D.<sup>1</sup>, Giovambattista De Sarro, MD<sup>1</sup>, Emilio Russo, MD, Ph.D.<sup>1,\*</sup>



# NFkB

250 kDa →

150 kDa →

100 kDa →

75 kDa →

50 kDa →

37 kDa →

25 kDa →

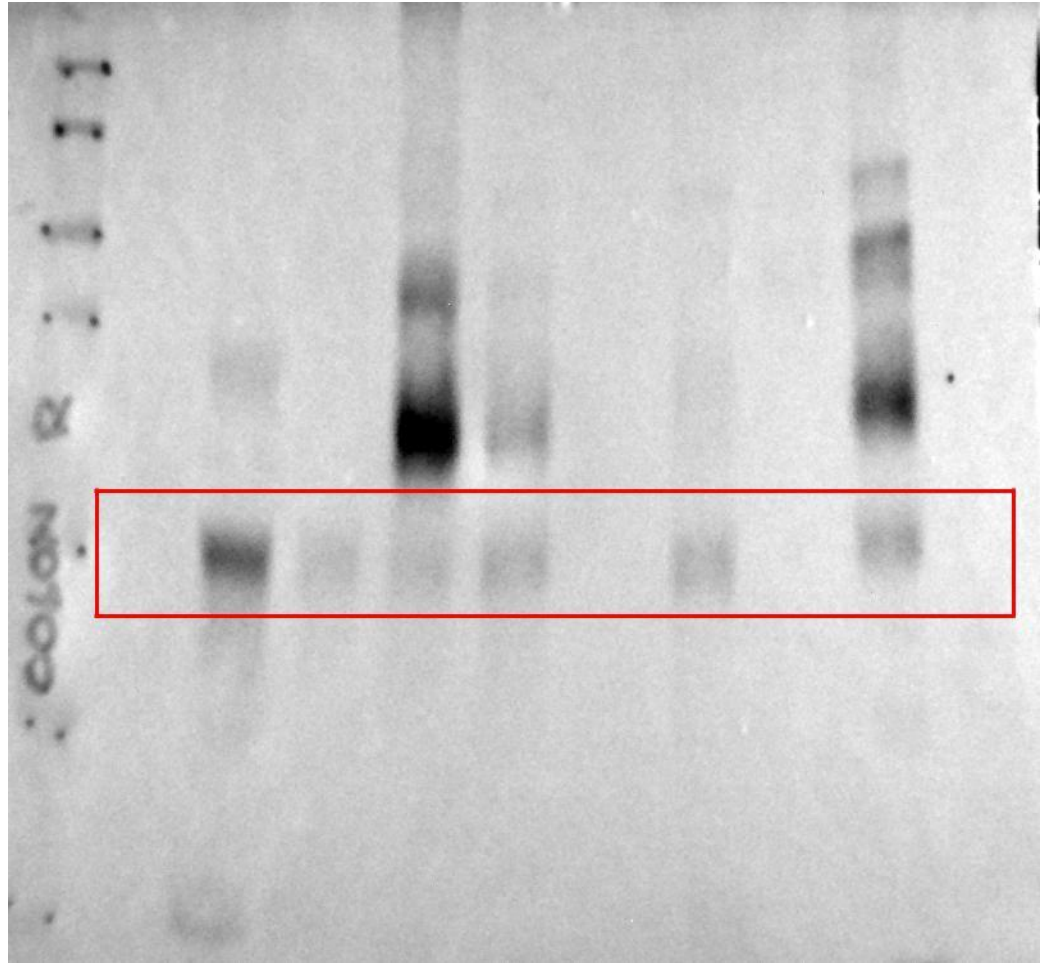

# COX-2

150 kDa →

100 kDa →

75 kDa →

50 kDa →

37 kDa →

25 kDa →

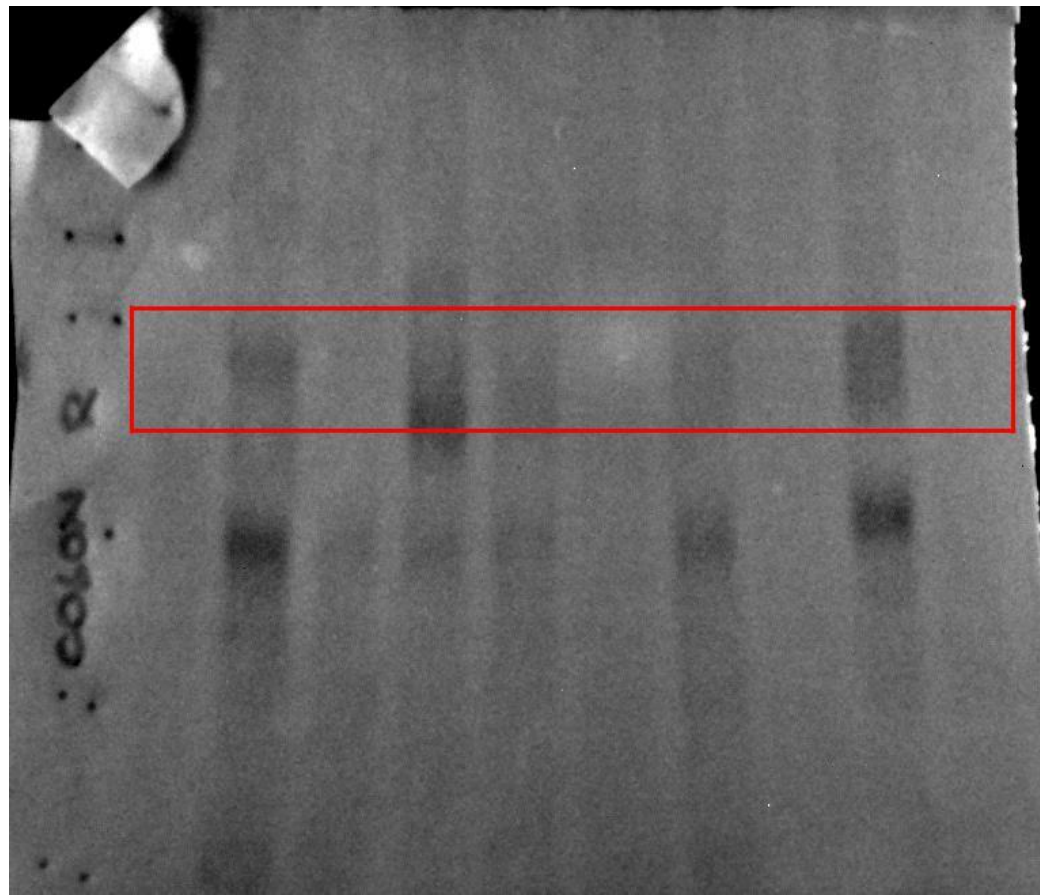

# ikB alpha

250 kDa →

150 kDa →

100 kDa →

75 kDa →

50 kDa →

37 kDa →

25 kDa →

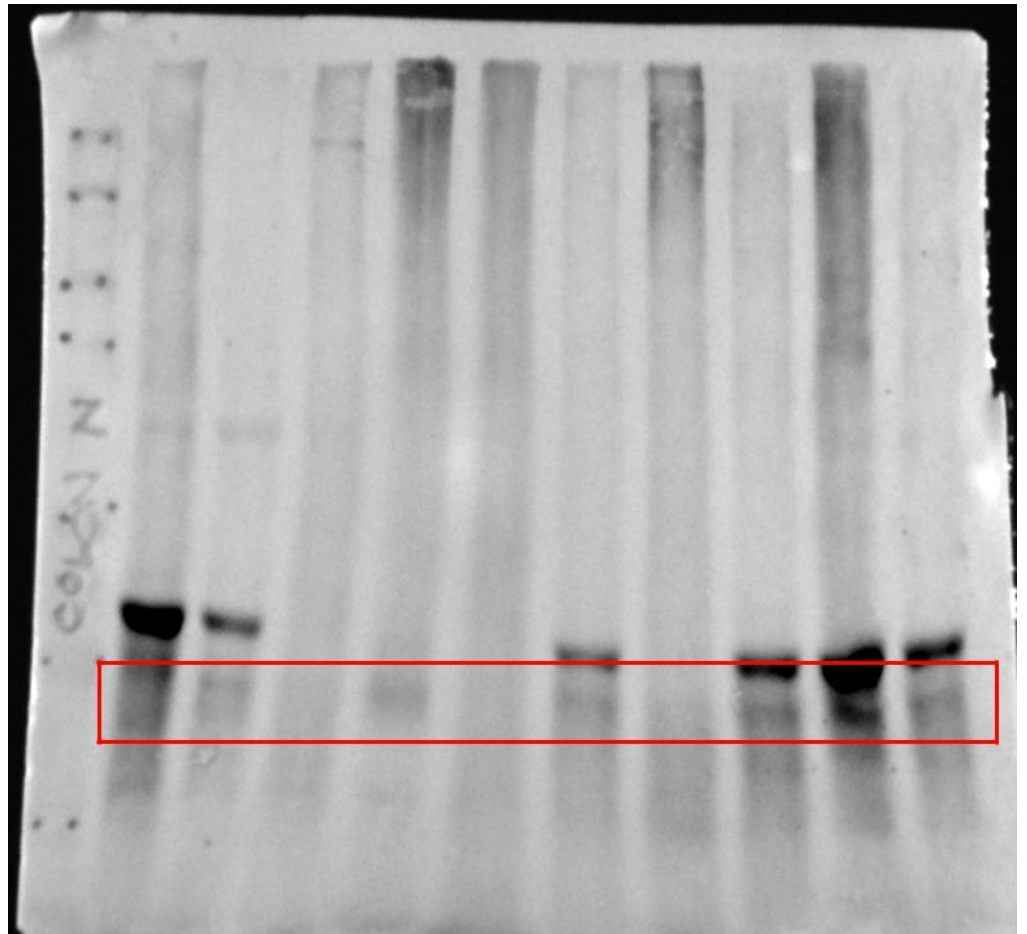

# occludin

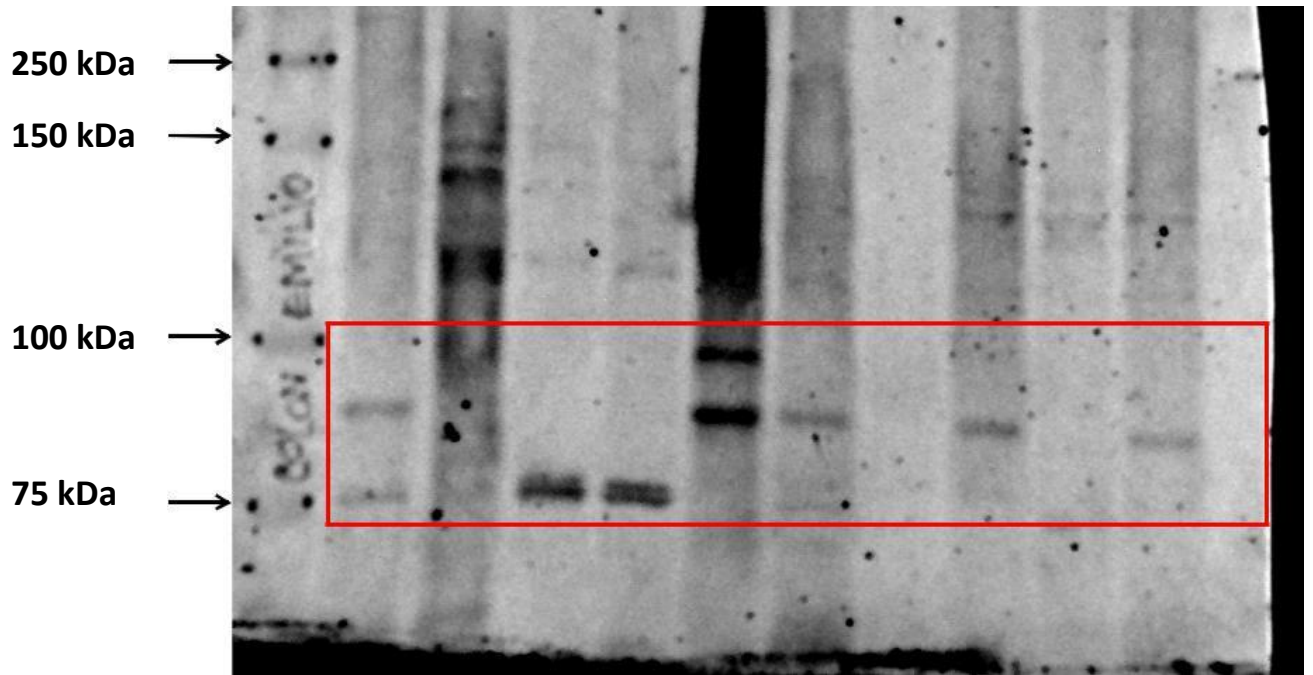

**$\beta$  actin**

50 kDa

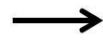

37 kDa

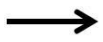

25 kDa

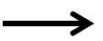

20 kDa

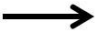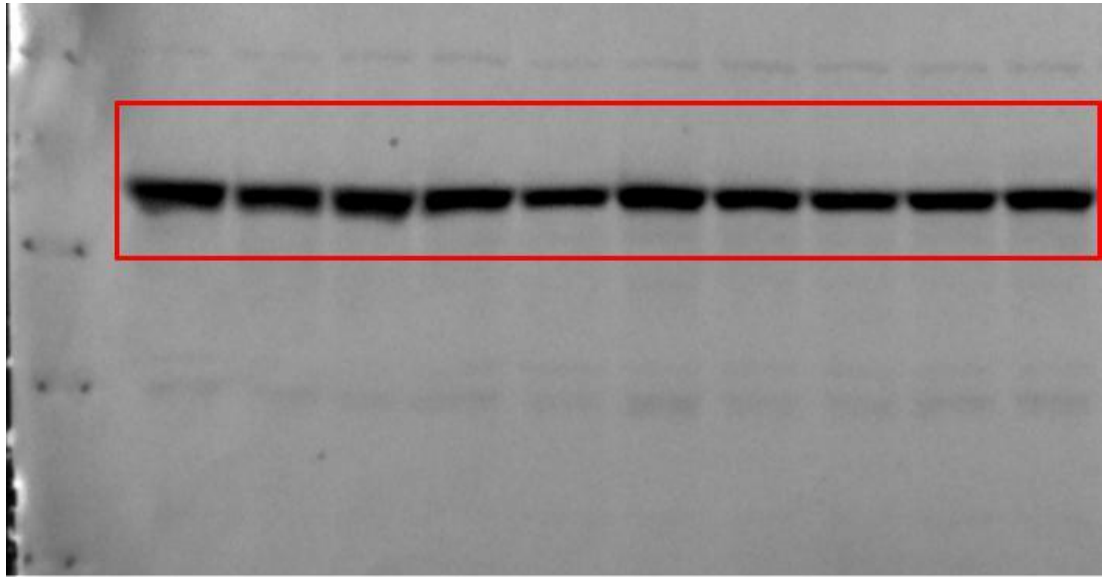

# iNOS

250 kDa →

150 kDa →

100 kDa →

75 kDa →

50 kDa →

37 kDa →

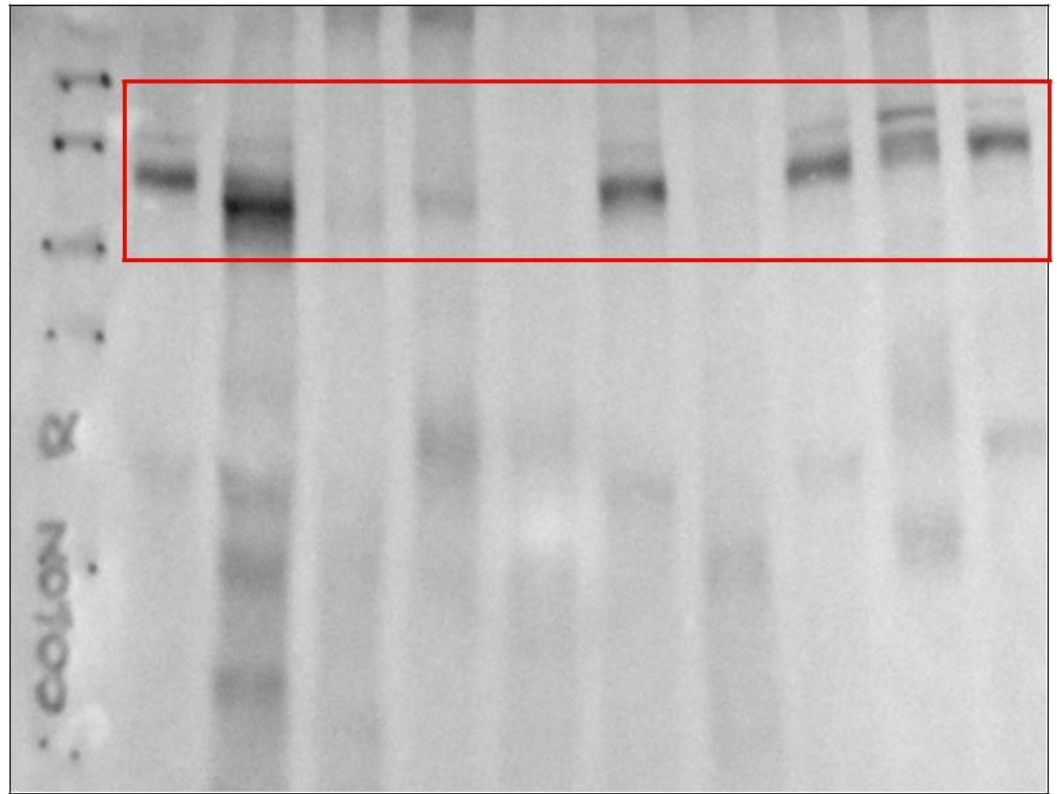



# NFkB

75 kDa →

50 kDa →

37 kDa →

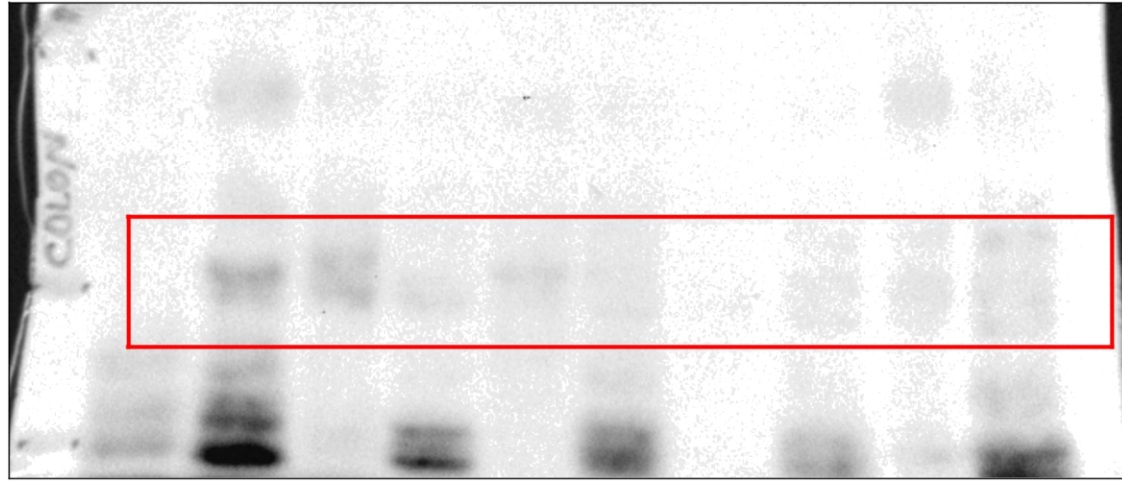

# COX-2

150 kDa →

100 kDa →

75 kDa →

50 kDa →

37 kDa →

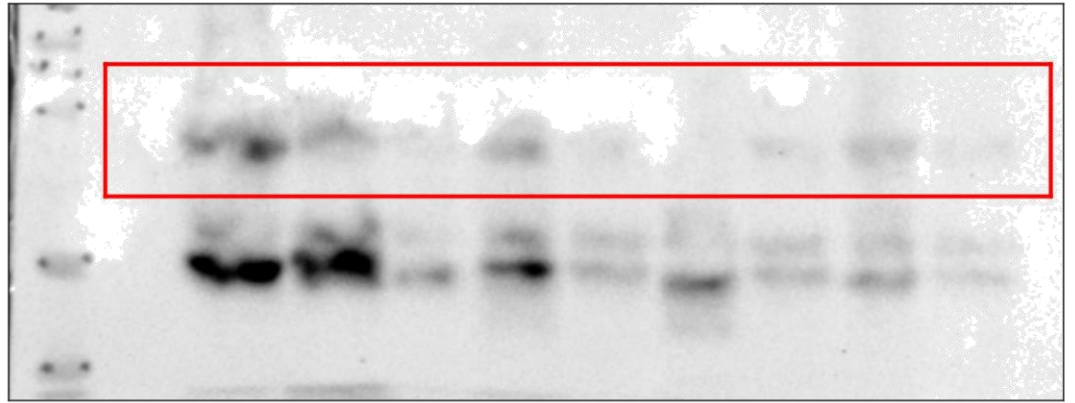

# ikB alpha

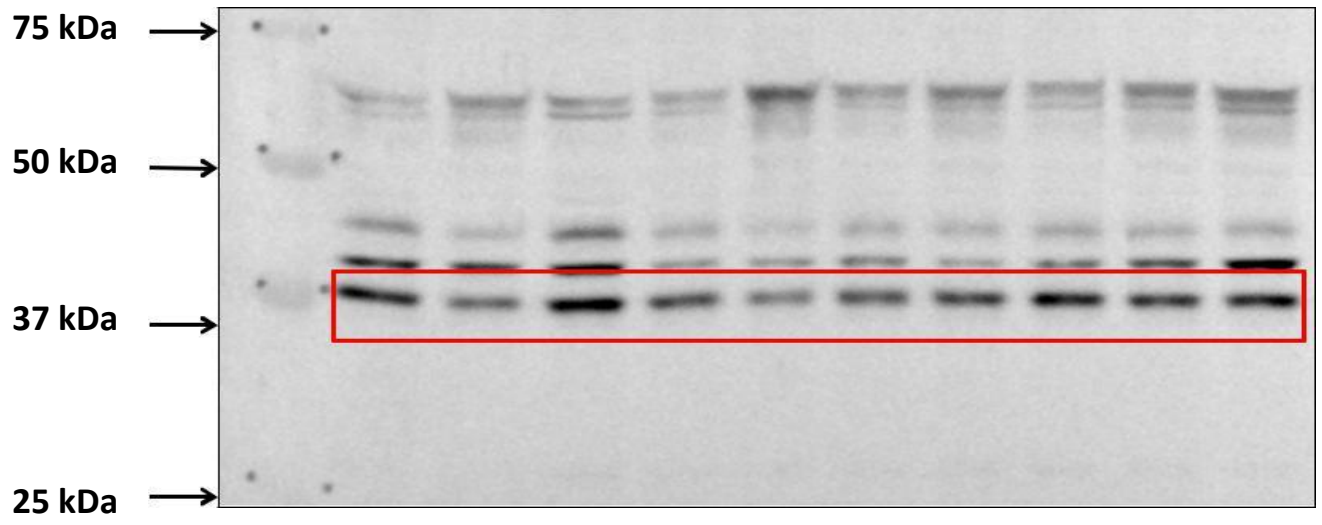

# occludin

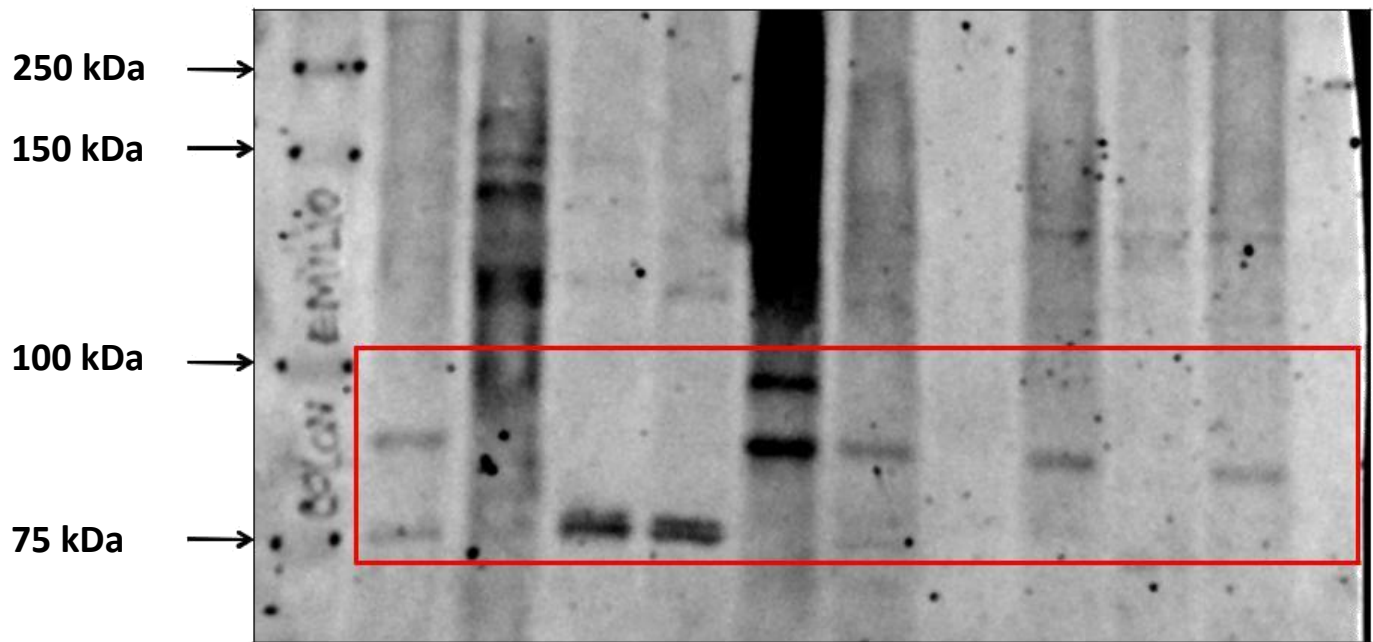

**$\beta$  actin**

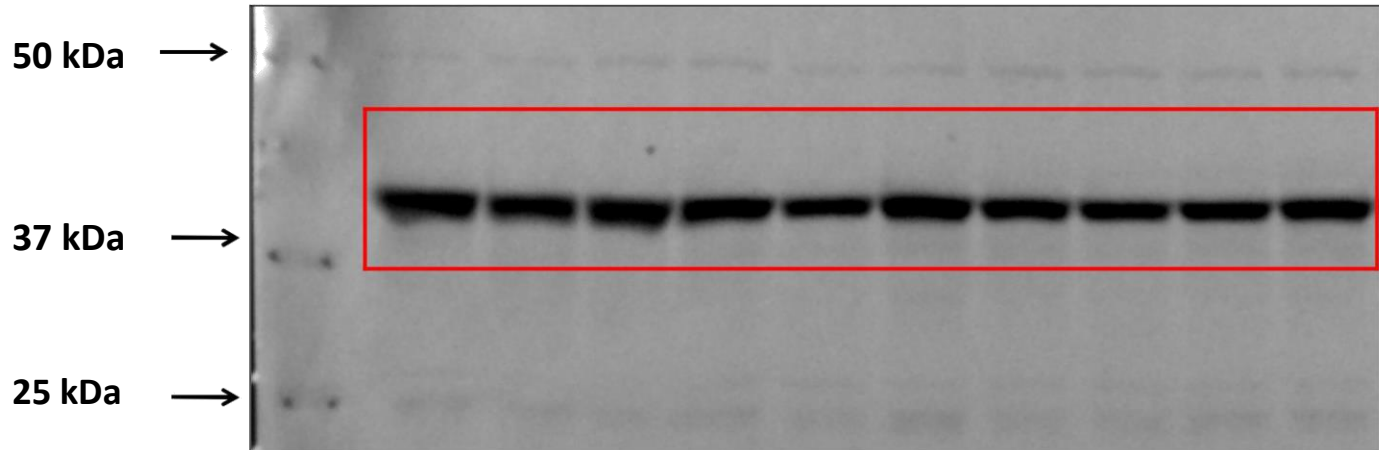

**$\beta$  actin**

50 kDa

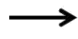

37 kDa

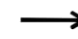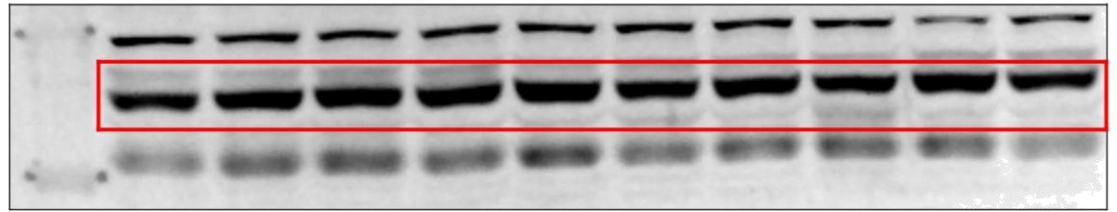

Supplement: 41598_2019_50542_MOESM1_ESM.pdf [file 41598_2019_50542_MOESM1_ESM.pdf]
